# Supplementary material for: The mode of action of plant associated Burkholderia against grey mould disease in grapevine revealed through traits and genomic analyses
Source: PubMed Central journal article supplement (PMC7655954; doi:10.1038/s41598-020-76483-7), 2020-11-10
Supplement: 41598_2020_76483_MOESM1_ESM.pdf [file 41598_2020_76483_MOESM1_ESM.pdf]

## Scientific reports

### Supplementary material

## The mode of action of plant associated *Burkholderia* against grey mould disease in grapevine revealed through traits and genomic analyses

Qassim Esmaeel<sup>1\*</sup>, Cédric Jacquard<sup>1</sup>, Lisa Sanchez<sup>1</sup>, Christophe Clément<sup>1</sup>, Essaid Ait Barka<sup>1\*</sup>

<sup>1</sup>Unité de Résistance Induite et Bioprotection des Plantes EA 4707, SFR Condorcet FR CNRS 3417, University of Reims-Champagne-Ardenne, Reims, France

**\*Correspondence:** [Prof. Essaid Ait Barka and Dr. Qassim ESMAEEL, Unité de Résistance Induite et Bioprotection des Plantes EA 4707, SFR Condorcet FR CNRS 3417, University of Reims-Champagne-Ardenne, Reims, France]. **E-mail:** [ea.barka@univ-reims.fr & qassim.esmaeel@univ-reims.fr]

**Supplementary Table S1.** List of primers used in this study

| Primers  | Sequences (5'-----> 3')    | References |
|----------|----------------------------|------------|
| FD2      | AGAGTTTGATCATGGCTCAG       | 1          |
| RP1      | ACGGTTACCTTGTTACGACTT      |            |
| Vv60RSPF | ATCTACCTCAAGCTCCTAGTC      | 2          |
| Vv60RSPR | CAATCTTGTCCTCCTTTCT        |            |
| VvEF1aF  | AACCAAATATCCGGAGTAAAAGA    | 2          |
| VvEF1aR  | GAACTGGGTGCTTGATAGGC       |            |
| Chit4cF  | TCGAATGCGATGGTGGAAA        | 3          |
| Chit4cR  | TCCCCTGTGCGAAACACCAAG      |            |
| PR5F     | TTTGATCATCCTTAGGGTAGCTGTAA |            |
| PR5R     | ACCAATGAGTACTGTTGCAATTCC   |            |
| PR10F    | CGTTAAGGGCGGCAAAGAG        | 4          |
| PR10R    | GCATCAGGGTGTGCCAAGA        |            |
| GST1F    | TGCATGGAGGAGGAGTTCGT       | 5          |
| GST1R    | CAAGGCTATATCCCATTTTCTTC    |            |
| JAZ1F    | GAGAAGGGCACGTTTGGAGA       | 6          |
| JAZ1R    | CATCGTCGTTGTTGTCGCTG       |            |

## References

- Asghari, S., Harighi, B., Mozafari, A., Esmaeel, Q. & Ait Barka, E. Screening of endophytic bacteria isolated from domesticated and wild growing grapevines as potential biological control agents against crown gall disease. *BioControl* **64**, 723–735. doi:10.1007/s10526-019-09963-z (2019).
- Sawicki, M. *et al.* Distinct regulation in inflorescence carbohydrate metabolism according to grapevine cultivars during floral development. *Physiol. Plant.* **154**, 447-467. doi:10.1111/ppl.12321 (2015).
- Esmaeel, Q., Jacquard, C., Clément, C., Sanchez, L. & Ait Barka, E. Genome sequencing and traits analysis of *Burkholderia* strains reveal a promising biocontrol effect against grey mould disease in grapevine (*Vitis vinifera* L.). *World J. Microbiol. Biotechnol.* **35**. doi:10.1007/s11274-019-2613-1 (2019).
- Castro, A. J. *et al.* The herbicide flumioxazin stimulates pathogenesis-related gene expression and enzyme activities in *Vitis vinifera*. *Physiol. Plant.* **134**, 453-463. doi:10.1111/j.1399-3054.2008.01151.x (2008).
- Letousey, P. *et al.* Early events prior to visual symptoms in the apoplectic form of grapevine esca disease. *Phytopathol.* **100**, 424-431. doi:10.1094/phyto-100-5-0424 (2010).
- Miotto-Vilanova, L. *et al.* *Burkholderia phytofirmans* PsJN confers grapevine resistance against *Botrytis cinerea* via a direct antimicrobial effect combined with a better resource mobilization. *Front. Plant Sci.* **7**, 1236. doi:10.3389/fpls.2016.01236 (2016).

**Supplementary Table S2.** Biochemical characteristics for BE17 AND BE24 based on BIOLOG GENIII microtiter plate (Hayward CA, USA) as recommended by manufacturers.

| Oxidation of                | BE17 | BE24 | Oxidation of                      | BE17 | BE24 | Oxidation of                  | BE17 | BE24 |
|-----------------------------|------|------|-----------------------------------|------|------|-------------------------------|------|------|
| Acetic acid                 | +    | -    | $\beta$ -hydroxy-D,L-butyric acid | +    | +    | D-serine                      | -    | -    |
| Acetoacetic acid            | ±    | -    | Inosine:                          | -    | -    | L-serine                      | +    | +    |
| L-alanine                   | +    | +    | $\alpha$ -ketobutyric acid        | -    | ±    | D-sorbitol:                   | +    | +    |
| $\gamma$ -aminobutyric acid | +    | +    | $\alpha$ -ketoglutaric acid       | -    | -    | Stachyose                     | -    | -    |
| D-arabitol                  | +    | +    | L-lactic acid                     | +    | +    | Sucrose                       | +    | +    |
| L-arginine                  | +    | +    | D-lactic acid methylester         | -    | -    | D-trehalose                   | -    | -    |
| D-aspartic acid             | +    | -    | D-lactose                         | -    | +    | D-turanose                    | ±    | -    |
| Bromo-succinic acid         | +    | ±    | D-malic acid                      | -    | ±    | Tween 40                      | +    | +    |
| Citric acid                 | +    | +    | L-malic acid                      | +    | +    | <b>Growth in presence of:</b> |      |      |
| Dextrin                     | ±    | ±    | D-maltose:                        | -    | -    | Aztreonam                     | +    | +    |
| D-fructose                  | +    | +    | D-mannitol                        | +    | +    | Fusidic acid                  | +    | -    |
| D-fructose-6-PO4            | +    | +    | D-mannose:                        | ±    | +    | Guanidine HCl                 | ±    | ±    |
| D-fucose                    | -    | ±    | D-melibiose                       | -    | ±    | Incomycin                     | +    | +    |
| L-fucose                    | +    | +    | 3-methylglucose                   | +    | ±    | Lithium chloride              | -    | -    |
| Formic acid                 | +    | +    | $\beta$ -methyl-D-glucoside       | -    | -    | Minocycline                   | +    | -    |

|                               |   |   |                                  |   |   |                     |   |   |
|-------------------------------|---|---|----------------------------------|---|---|---------------------|---|---|
| Gelatin                       | + | - | Methylpyruvate                   | + | + | NaCl (1%)           | + | + |
| Gentiobiose                   | - | ± | Mucic acid                       | + | + | NaCl (4%)           | - | - |
| L-galactonic acid lactone:    | + | + | Myo-inositol                     | + | + | NaCl (8%)           | - | - |
| D-galactose                   | + | + | N-acetyl-D-galactosamine         | ± | - | Nalidixic acid      | ± | + |
| D-galacturonic acid:          | + | + | N-acetyl- $\beta$ -D-mannosamine | - | - | Niaproof 4          | + | + |
| D-gluconic acid               | + | + | N-acetyl neuraminic acid         | - | - | pH 5                | + | + |
| $\alpha$ -D-glucose:          | + | + | Pectin                           | + | + | pH 6                | + | + |
| D-glucose-6-PO4               | + | + | P-hydroxyphenylacetic acid:      | ± | + | Potassium tellurite | + | + |
| Glucuronamide                 | + | + | Propionic acid:                  | ± | + | Rifamycin SV        | + | + |
| D-glucuronic acid             | + | + | L-pyroglutamic acid              | + | + | Sodium bromate      | - | - |
| L-glutamic acid               | + | + | Quinic acid                      | + | + | Sodium butyrate     | - | ± |
| Glycerol                      | + | + | D-raffinose:                     | ± | - | 1% sodium lactate   | + | + |
| Glycyl-L-proline              | ± | - | L-rhamnose                       | - | ± | Tetrazolium blue:   | + | + |
| L-histidine                   | + | + | D-saccharic acid                 | + | + | Tetrazolium violet  | + | + |
| $\alpha$ -hydroxybutyric acid | - | - | D-salicin                        | + | - | Troleandomycin      | + | + |
|                               |   |   |                                  |   |   | Vancomycin          | + | + |

-: negative, +: positive, ±: borderline

**Supplemental Table S3.** Genomic screening of *Burkholderia* sp. BE17 and *Burkholderia* sp. BE24 for genes involved in the plant-bacteria relationship and functions possibly involved in biocontrol. Numbers indicate the nb of associated genes found, +: presence of associated genes, -: absent

| Class or gene function                             |                                                      | BE17   | BE24   |
|----------------------------------------------------|------------------------------------------------------|--------|--------|
| <b>I. Genes involved in plant growth promoting</b> |                                                      |        |        |
| IAA production                                     | Indole acetamide hydrolase                           | 2      | 2      |
|                                                    | Indole-3-pyruvate                                    | 1      | 1      |
| ACC deamination                                    | Indole-3-glycerol phosphate synthase                 | 1      | 1      |
|                                                    | 1-aminocyclopropane-1-carboxylate deaminase          | 1      | 1      |
| Phosphate solubilization                           | Phosphoenolpyruvate carboxylase (Pepc)               | +      | +      |
|                                                    | The PQQ dependent glucose dehydrogenase              | +      | +      |
|                                                    | ABC transporter complex (pstA, pstB, pstC, and pstS) | +      | +      |
|                                                    | The Pho regulon (PhoB-PhoR, PhoU)                    | +      | +      |
|                                                    | Exopolyphosphatase (Ppx)                             | +      | +      |
|                                                    | Polyphosphate kinase (Ppk)                           | +      | +      |
| <b>II. Genes involved in plant colonization</b>    |                                                      |        |        |
| Chemotaxis and swarming motility                   | Type IV pili                                         | +      | +      |
|                                                    | Flagella                                             | 74 (+) | 48 (+) |
|                                                    | Chemotaxis                                           | +      | +      |
|                                                    | Methyl-accepting chemotaxis protein II               | 66     | 66     |
| Signaling                                          | Chemotaxis protein                                   | 29 (+) | 28 (+) |
|                                                    | Two component system                                 | 32     | 39     |
| Quorum-sensing                                     | Sigma factors                                        | 9      | 20     |
|                                                    | Acyl-homoserine-lactone based system                 | +      | +      |
|                                                    | Endoglucanase                                        | +      | +      |
| Plant cell wall degrading enzymes                  | Polygalacturonase                                    | +      | +      |
|                                                    | Glycoside hydrolyses                                 | +      | +      |
|                                                    | Beta-glucosidase                                     | +      | +      |
|                                                    | glycosidaes                                          | +      | +      |
| Fe uptake                                          | Alpha/beta hydrolase                                 | +      | +      |
|                                                    | TonB-dependent receptor                              | 14     | 22     |
|                                                    | Siderophore biosynthesis                             | +      | +      |
|                                                    | T1SS                                                 | -      | -      |
| Secretion systems                                  | T2SS                                                 | +      | +      |
|                                                    | T3SS                                                 | +      | +      |
|                                                    | T4SS                                                 | +      | +      |
|                                                    | T5SS                                                 | -      | -      |
|                                                    | T6SSa and b                                          | +      | +      |
| Detoxification                                     | Glutathione S-transferase                            | 16     | 15     |
|                                                    | Catalases                                            | 2      | 5      |

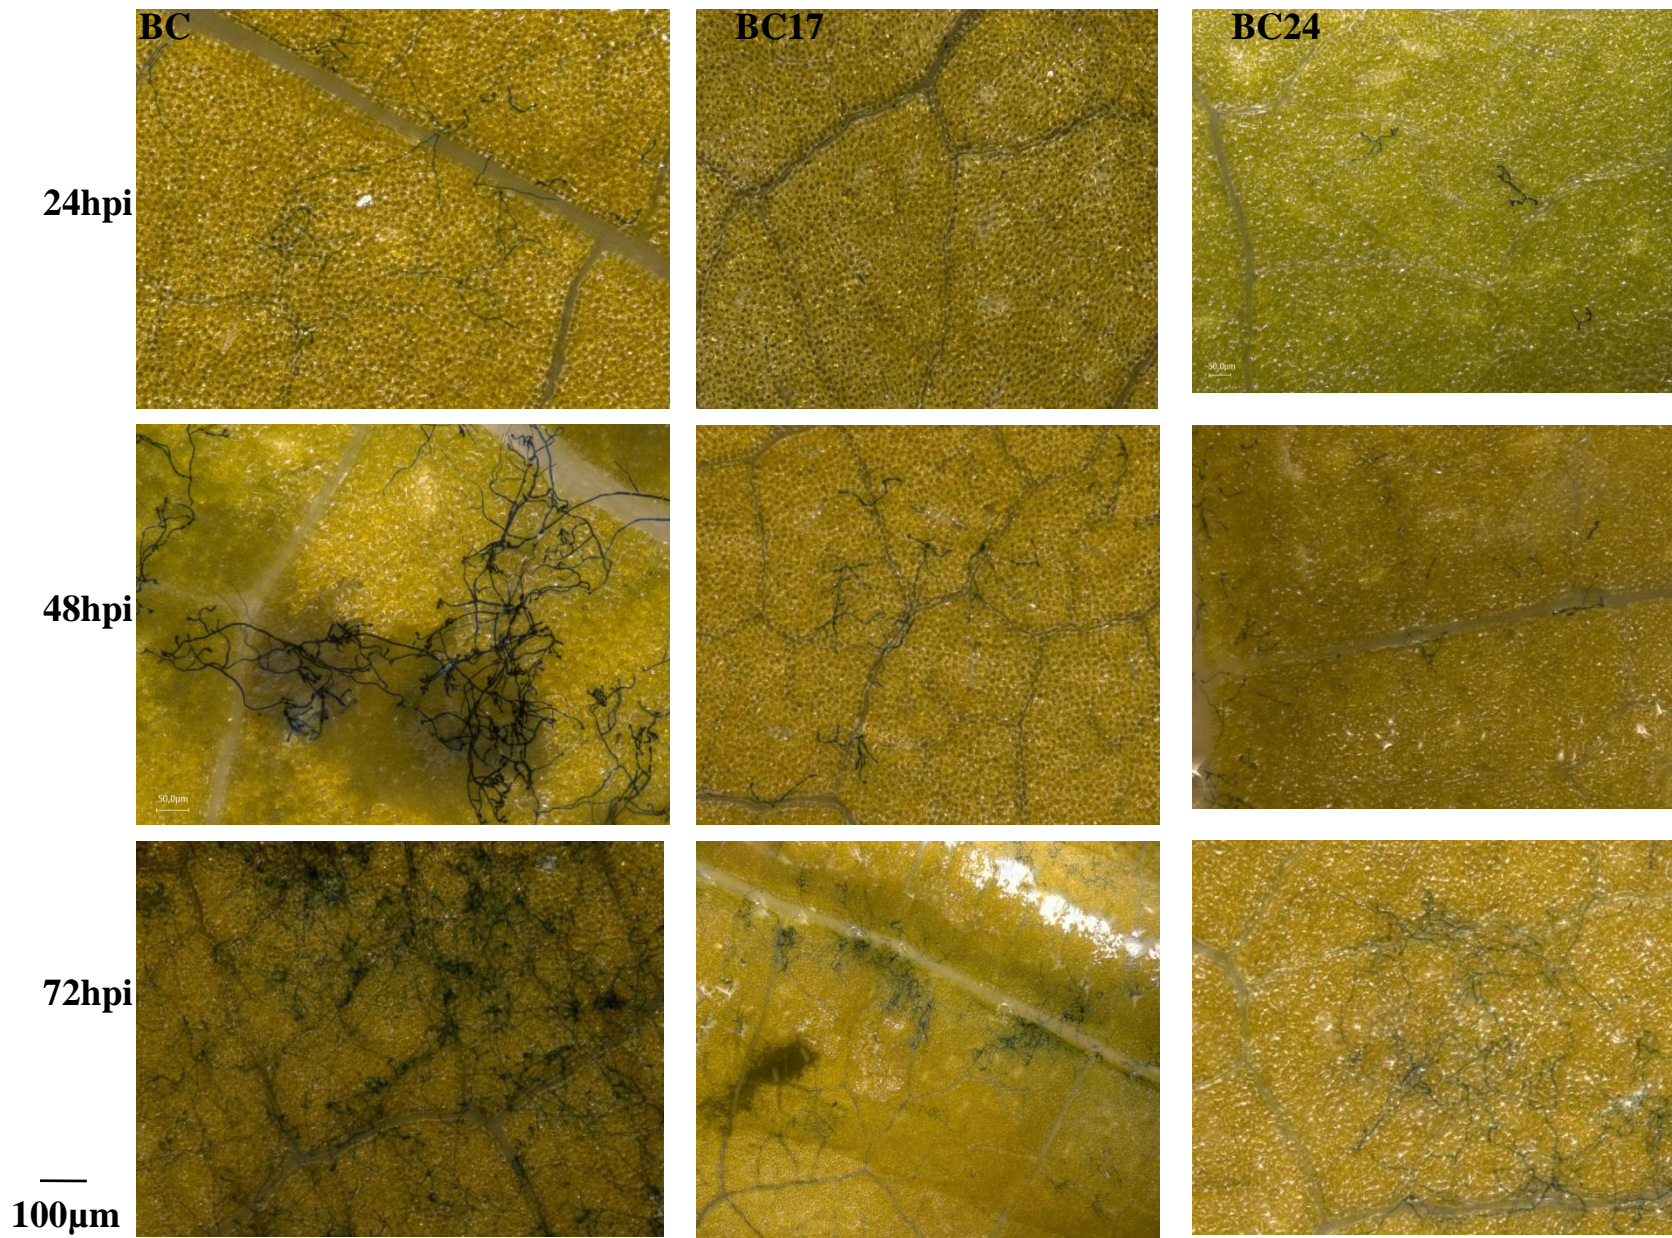

**Supplementary Figure S1.** Development of *B. cinerea* in plantlets inoculated or not with isolates BE17 and BE24
